# Supplementary material for: Adhesion switch on a gecko-foot inspired smart nanocupule surface
Source: Royal Society of Chemistry journal article supplement (doi:10.1039/c4nr04090b), 2014-01-01
Supplement: c4nr04090b1.pdf [file c4nr04090b1.pdf]

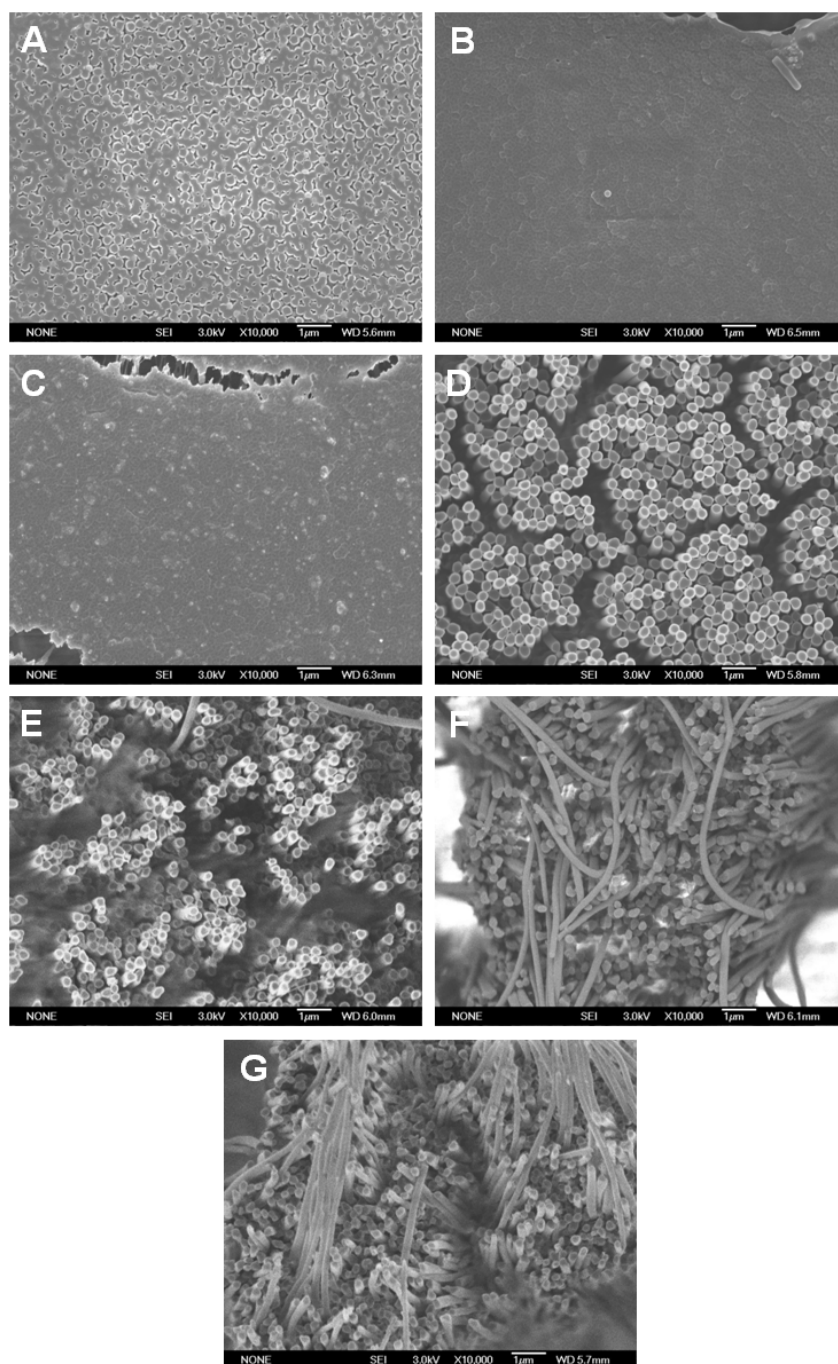

Figure S1 The SEM images of the prepared PNIPAm/PS film with different weight rate. A) 1:1; B) 1:2; C) 1:10; D) 1:99; E) 1:500; F) 1:800; G) 1:1000. When the PNIPAm/PS blend rates were 1:1, 1:2 and 1:9, they were almost smooth and no nanofibrils structures were observed on the surfaces; when the rates were 1:99, 1: 500, 1:800 and 1:1000, one could found the nanofibrils structures on the prepared film.

However the films with the prepared blend rates of 1: 500, 1:800 and 1:1000 exhibited large defects and poor film formation.
